# Supplementary material
Source: publisher figshare collection journal article supplement (https://acs.figshare.com/ndownloader/files/5501510)
Supplement: Supplementary file 1 [file 5501510]

Compound,Smiles,RLM Clint,CYP3A4 IC50,APTT IC50,VT IC50,"Thrombin, Ki","Trypsin 1, Ki","FVIIa, Ki","FIXa, Ki","FXa, Ki","FXIa, Ki","Plasmin, Ki",Solubility,LogD7.4,Caco-2 Papp AB,Efflux ratio,Rat CL (iv),Rat Vss (iv),Terminal t1/2 (iv),Terminal t1/2 (po),Terminal t1/2 (id),AUCinf of 2 (iv),AUCinf of 2 (po),AUCinf of 2 (id),F of 2 (po),F of 2 (id),Cmax (po),Cmax (id)
,,(mL/min/mg),(mM),"(mM, rat)",(nM),(nM),(nM),(nM),(nM),(nM),(nM),(nM),(mM),,(x 10-6 cm/s),,(mL/min/kg),(L/kg),(h),(h),(h),(h × mmol/L),(h × mmol/L),(h × mmol/L),(%),(%),(mmol/L),(mmol/L)
1,O=C1N(NCC2=CC=CC=C2)CCC(C)=C1CC(NCC3=CC(Cl)=CC=C3CN)=O,150,13,0.68,72,0.5,>5400,>33000,>29000,>17000,>19000,>19000,,,,,,,,,,,,,,,,
2,O=C1N(NCC2=CC(C(O)=O)=CC=C2)CCC(C)=C1CC(NCC3=CC(Cl)=CC=C3CN)=O,<15,>50,1.2,97,4.6,>5400,>33000,>29000,>17000,>19000,>19000,>100,-0.5,0.10,2.4,32.4,0.23,0.35,0.56,,0.258,0.0025,,0.5,,0.004,
3,O=C1N(NCC2=CC(C(OCO3)=O)=CC=C2)CCC(C)=C1CC(NCC4=CC(Cl)=CC=C4CNC3=O)=O,,,,,200,>5400,,,,,,120,2.3,48,5.6,,,,1.12,0.11,,0.0127,0.0081,2.5,1.6,0.011,0.108
4,O=C1N(NCC2=CC(C(OC(C)O3)=O)=CC=C2)CCC(C)=C1CC(NCC4=CC(Cl)=CC=C4CNC3=O)=O,,,,,,,,,,,,340,2.6,45,4.8,,,,,,,,,,,,
5,O=C1N(NCC2=CC(C(OC)=O)=CC=C2)CCC(C)=C1CC(NCC3=CC(Cl)=CC=C3CNC(OC)=O)=O,,,,,,,,,,,,160,2.9,54,3.3,,,,,,,,,,,,
,,,,,,,,,,,,,,,,,,,,,,,,,,,,
,,,,,,,,,,,,,,,,,,,,,,,,,,,,
,,,,,,,,,,,,,,,,,,,,,,,,,,,,
,,,,,,,,,,,,,,,,,,,,,,,,,,,,
,,,,,,,,,,,,,,,,,,,,,,,,,,,,
,,,,,,,,,,,,,,,,,,,,,,,,,,,,
,,,,,,,,,,,,,,,,,,,,,,,,,,,,
